# Supplementary material for: Covalently linked metal–organic framework (MOF)-polymer all-solid-state electrolyte membranes for room temperature high performance lithium batteries
Source: Royal Society of Chemistry journal article supplement (doi:10.1039/c8ta05642k), 2018-01-01
Supplement: c8ta05642k1.pdf [file c8ta05642k1.pdf]

**Covalently-linked metal–organic framework (MOF)-polymer  
all-solid-state electrolyte membrane for room temperature high  
performance lithium batteries**

Zhinan Wang,<sup>‡a</sup> Shi Wang,<sup>‡a</sup> Ailian Wang,<sup>a</sup> Xu Liu,<sup>a</sup> Jie Chen,<sup>a</sup> Qinghui Zeng,<sup>a</sup> Lei Zhang,<sup>b</sup> Wei Liu,<sup>\*a</sup> and  
Liaoyun Zhang<sup>\*a</sup>

---

<sup>a</sup> School of Chemical Sciences, University of Chinese Academy of Sciences, Beijing 100049, China. \*E-mail: zhangly@ucas.ac.cn;

weiliu@ucas.ac.cn

<sup>b</sup> College of Science, China University of Petroleum-Beijing (CUPB), Beijing 102249, China.

<sup>‡</sup> Zhinan Wang and Shi Wang contributed equally to this work.

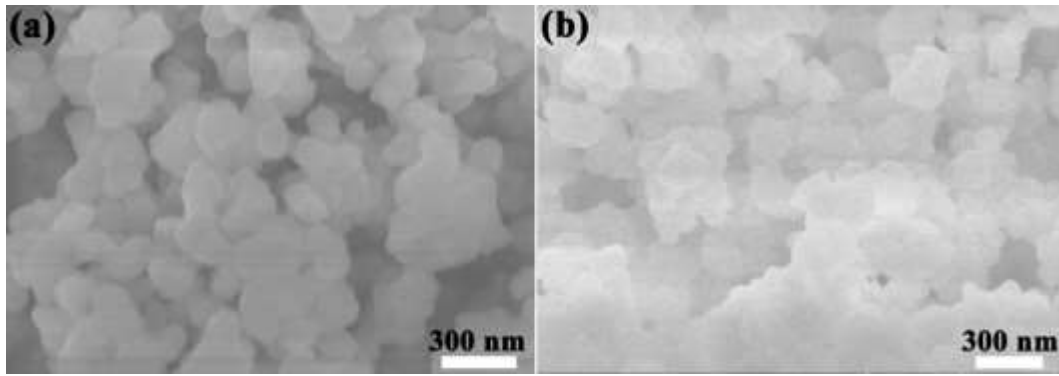

**Figure S1.** SEM images of (a) UiO-66-NH<sub>2</sub> and (b) M-UiO-66-NH<sub>2</sub>, respectively.

**(a)**

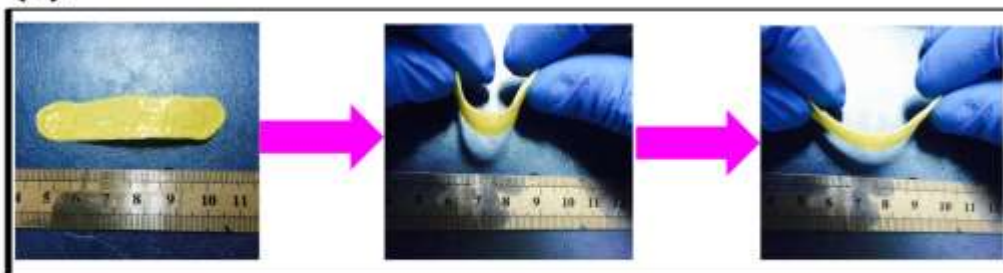

**(b)**

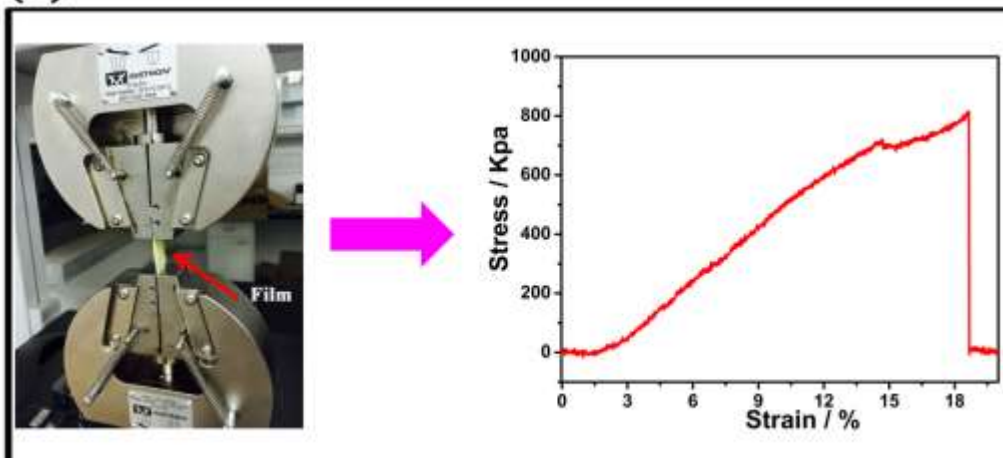

**Figure S2.** (a) The flexible and free-standing HSPE-1-8 film, which is used to test the mechanical strength. (b) The stretching device and the corresponding stress-strain curve of the HSPE-1-8 film.

Figure S2a shows that the free-standing HSPE-1-8 can be easily bent without breaking. It is seen in Figure S2b that the film exhibits a tensile strength of 820 Kpa (with an elongation-at-break value at ~20 %), indicating the film has good mechanical strength.

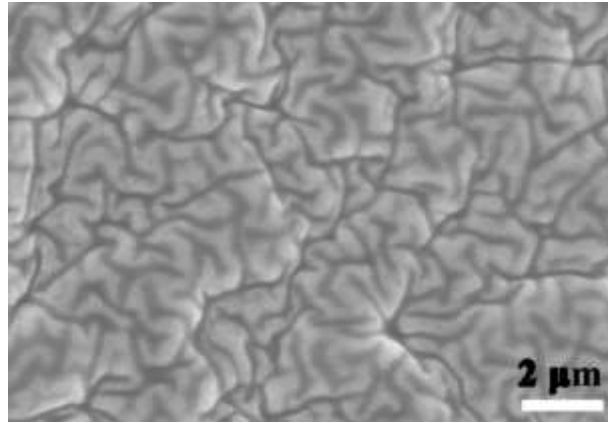

**Figure S3.** SEM image of HSPE-1-8, which shows obvious microphase separation phenomenon.

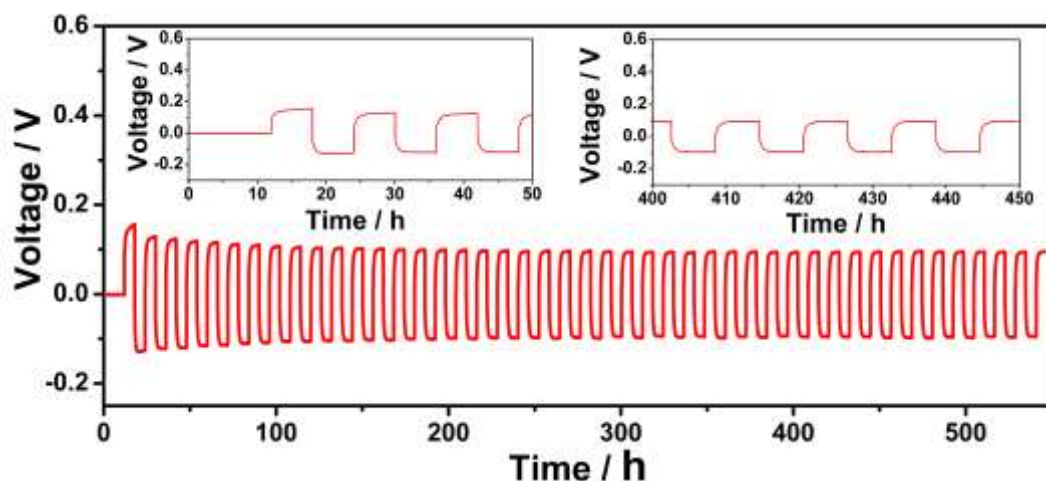

**Figure S4.** Li plating/stripping experiments of the Li/HSPE-1-8/Li symmetric cell at the current density of  $50 \mu\text{A cm}^{-2}$  (cycled at RT). The insets present the Li plating/stripping at the selected potential profiles.

Figure S4 shows galvanostatic cycling curve of the Li/HSPE-1-8/Li symmetric cell at the current density of  $50 \mu\text{A cm}^{-2}$  (cycled at RT). It is seen that the battery maintains a low voltage polarization without short circuiting after cycling for over 550 h, which suggests that the HSPE-1-8 has the ability to suppress the growth of lithium dendrites (highly stable cycling stability and reversibility for the lithium plating/stripping in the HSPE-1-8-based symmetric cell).
